# Supplementary material for: Demonstration of efficient electrochemical biogas reforming in a solid oxide electrolyser with titanate cathode
Source: Royal Society of Chemistry journal article supplement (doi:10.1039/c4ra05587j), 2014-01-01

## SUPPORTING INFORMATION

### Demonstration of efficient electrochemical biogas reforming in solid oxide electrolyser with titanate cathode

Qingqing Qin,<sup>a</sup> Kui Xie,<sup>a,b</sup> \* Haoshan Wei,<sup>a</sup> Wentao Qi,<sup>a</sup> Jiewu Cui,<sup>a</sup> Yucheng Wu<sup>a,b</sup> \*

<sup>a</sup>Department of Energy Materials, School of Materials Science and Engineering, Hefei University of Technology, No.193 Tunxi Road, Hefei, Anhui 230009, China

<sup>b</sup>Key Laboratory of Advanced Functional Materials and Devices, School of Materials Science and Engineering, Hefei University of Technology, No.193 Tunxi Road, Hefei, Anhui 230009, China

\*Corresponding: [xiekui@hfut.edu.cn](mailto:xiekui@hfut.edu.cn)

#### Captions

**Figure S1:** Schematic of the *in-situ* electrochemical biogas reforming in an oxide-ion-conducting solid oxide electrolyzer with the configuration  $(\text{La}_{0.8}\text{Sr}_{0.2})_{0.95}\text{MnO}_{3-\delta}/\text{YSZ}/\text{La}_{0.2}\text{Sr}_{0.8}\text{TiO}_{3+\delta}$ .

**Figure S2:** The conductivity of LSTO: (a) reduced LSTO in 5%  $\text{H}_2/\text{Ar}$ ; (b) in different oxygen partial pressure at 800 °C.

**Figure S3:** XPS results of La (a) in the oxidized LSTO sample; (b) in the reduced LSTO samples.

**Figure S4:** The  $R_p$  of the symmetric cells with the configuration LSTO-SDC/YSZ/LSM-SDC and iron-loaded LSTO-SDC/YSZ/LSM-SDC tested under different hydrogen partial.

**Figure S5:** SEM cathode surface of the composite cathode after short-term operation of the electrochemical biogas reforming with LSTO-SDC cathode.

**Figure S6:** The XRD pattern of  $\text{Ce}_{0.8}\text{Sm}_{0.2}\text{O}_{2-\delta}$  powder by a heat treatment at 800 °C for 3 h in air.

**Figure S7:**  $R_p$  of the electrolysis cells with cathodes based on LSTO-SDC and iron-loaded LSTO-SDC in 20% $\text{CH}_4/20\%\text{CO}_2/60\%\text{Ar}$  under different applied potentials at 800 °C.

**Figure S8:** The conversion of  $\text{CO}_2$  and  $\text{CH}_4$ : (a) based on LSTO and (b) based on iron-loaded LSTO in the flow of 20% $\text{CH}_4/20\%\text{CO}_2/60\%\text{Ar}$  at 800 °C.

**Figure S9:** (a) The production of  $\text{H}_2$ ; (b) The production of CO with LSTO and iron-loaded LSTO in the flow of 20% $\text{CH}_4/20\%\text{CO}_2/60\%\text{Ar}$  at 800 °C.

**Figure S10:** XRD pattern of  $\text{Fe}_2\text{O}_3$  powder treated at different temperatures from 400-800 °C.

**Figure S11:** particle size of  $\text{Fe}_2\text{O}_3$  powder treated at different temperatures from 400-800 °C.

Figure S1:

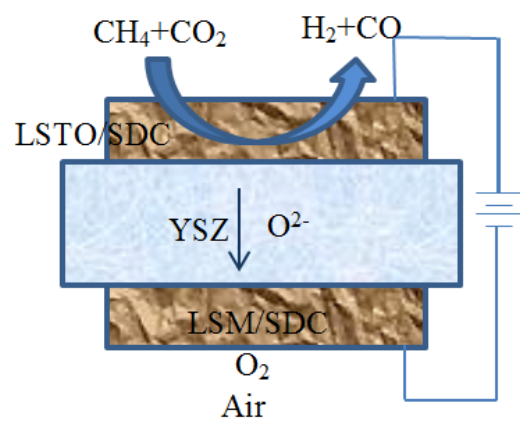

Figure S2:

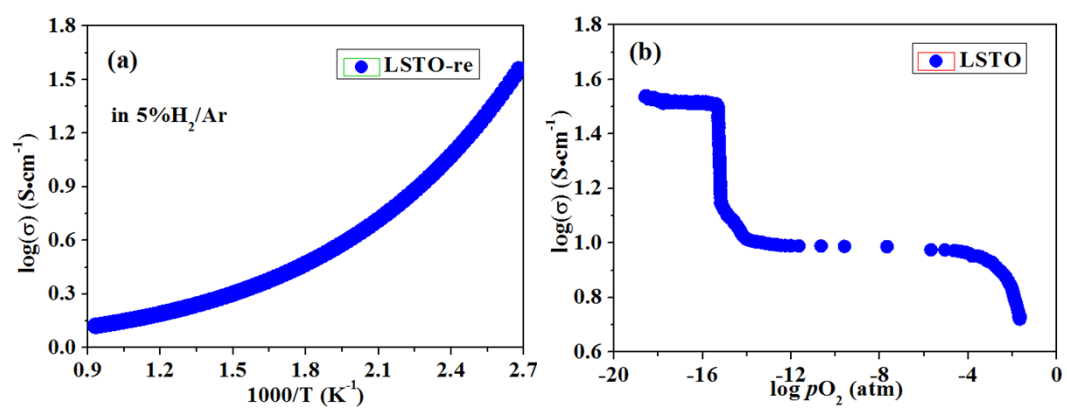

Figure S3

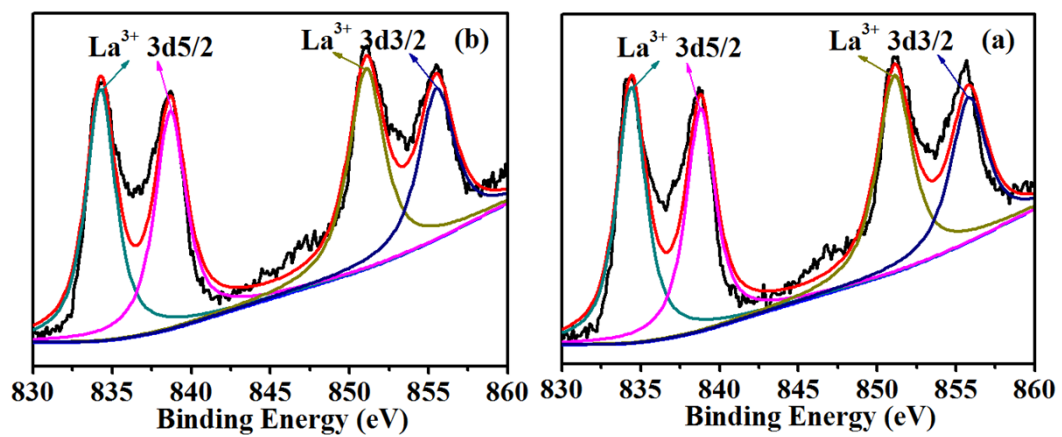

Figure S4:

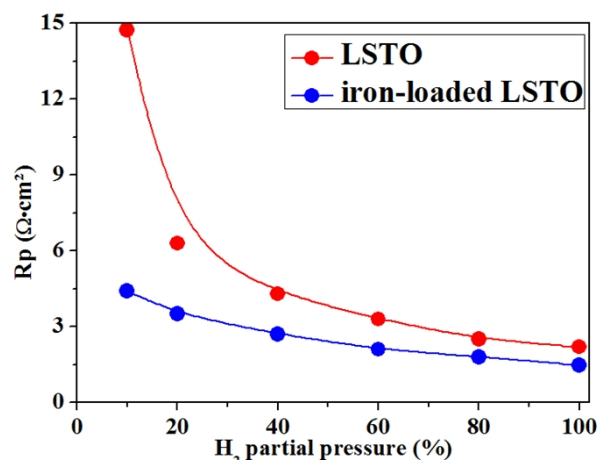

**Figure S5:**

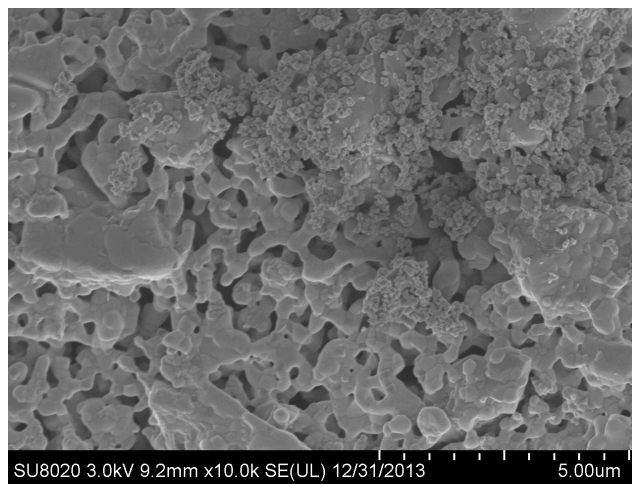

Figure S6:

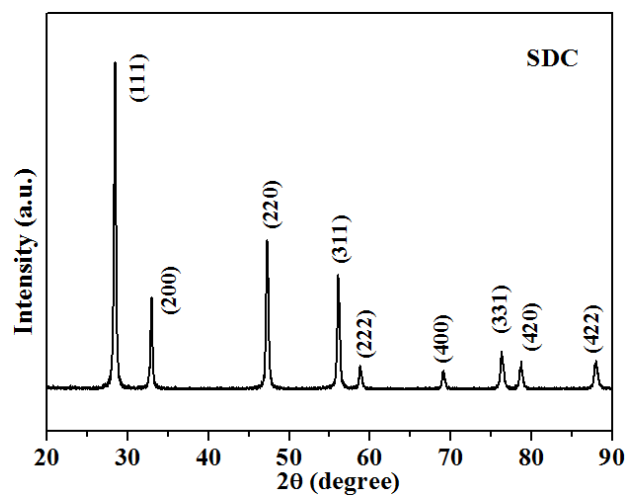

Figure S7:

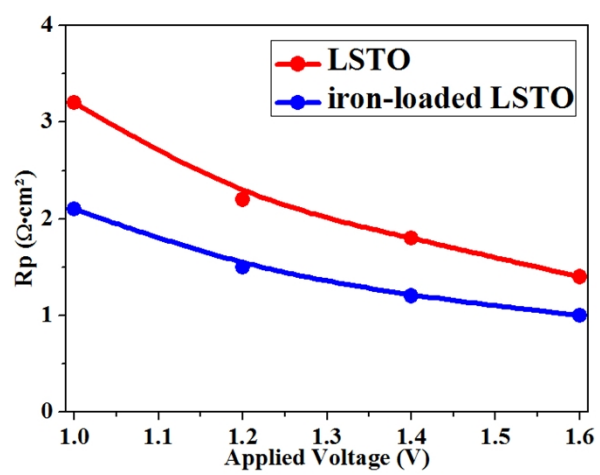



**Figure S8:**

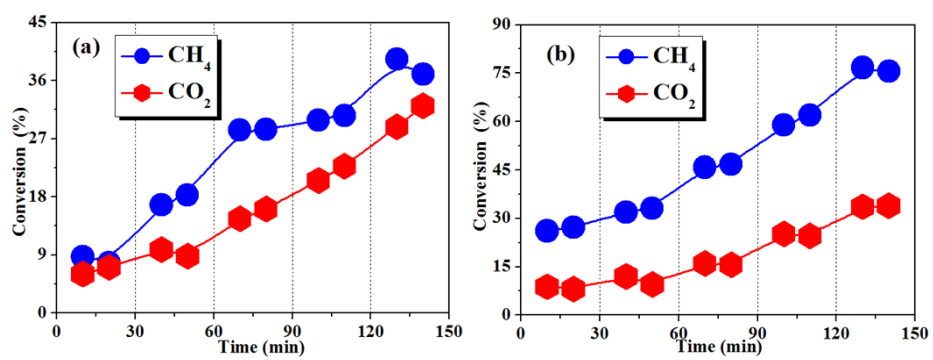

**Figure S9:**

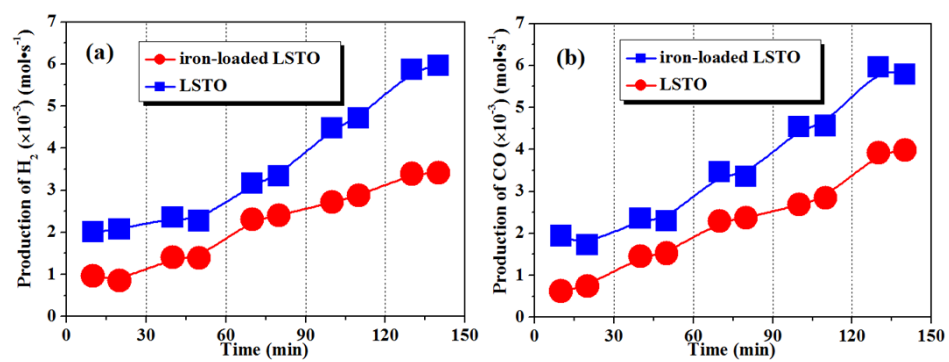

**Figure S10:**

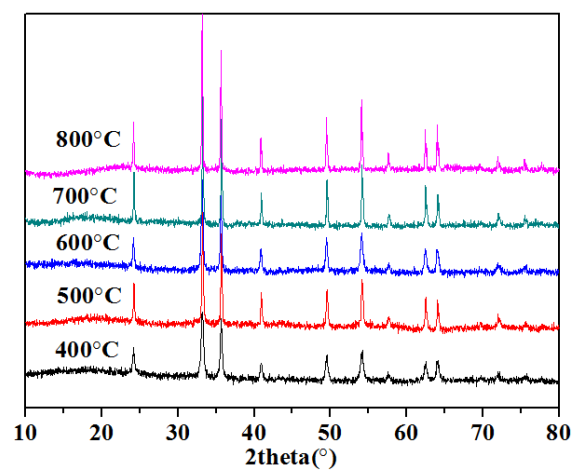

**Figure S11:**

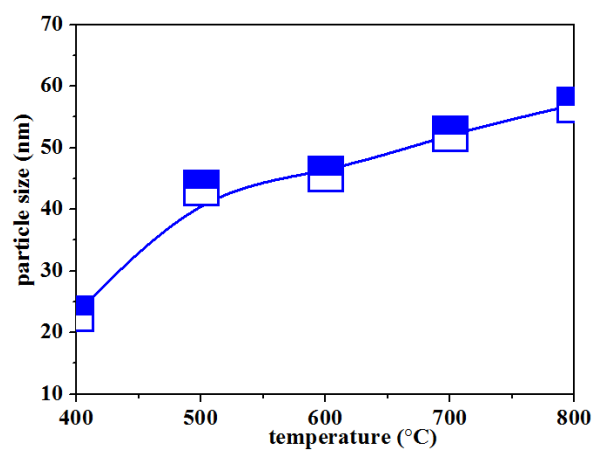

Supplement: c4ra05587j2.pdf [file c4ra05587j2.pdf]
